# Supplementary material for: The role of flood wave superposition in the severity of large floods
Source: Copernicus journal article supplement (doi:10.5194/hess-24-1633-2020), 2020-04-06
Supplement: Supplementary file 1 [file hess-24-1633-2020-supplement.zip]

Archive with 5 entries (5 files):
- Event_Separation_Tool.m
- Annual_maxima_series.m
- Event_derivation_downstream_gauge.m
- Event_derivation_upstream_tributary_gauges.m
- hess-24-1633-2020-supplement-title-page.pdf
