# Supplementary material for: The role of flood wave superposition in the severity of large floods
Source: Copernicus journal article supplement (doi:10.5194/hess-24-1633-2020), 2020-04-06
Supplement: Supplementary file 1 [file hess-24-1633-2020-supplement.zip › hess-24-1633-2020-supplement-title-page.pdf]

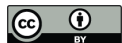

## *Supplement of*

# **The role of flood wave superposition in the severity of large floods**

**Björn Guse et al.**

*Correspondence to:* Björn Guse ([bjoern.guse@gfz-potsdam.de](mailto:bjoern.guse@gfz-potsdam.de))

- [hess-24-1633-2020-supplement-title-page.pdf](#)
- [Annual\\_maxima\\_series.m](#)
- [Event\\_Separation\\_Tool.m](#)
- [Event\\_derivation\\_downstream\\_gauge.m](#)
- [Event\\_derivation\\_upstream\\_tributary\\_gauges.m](#)

The copyright of individual parts of the supplement might differ from the CC BY 4.0 License.
